# Supplementary material
Source: MDPI journal article supplement (https://www.mdpi.com/1999-4907/15/4/648)
Supplement: s1 [file s1]

**Table S1.** Summary of results of infestation and mortality rates in the study area (182 plots).

| Species                | Total<br>assessed<br>trees | Non-<br>infested | Infested | Infested/Total<br>infested | Infestation<br>rate | Infested &<br>Dead | Mortality |
|------------------------|----------------------------|------------------|----------|----------------------------|---------------------|--------------------|-----------|
| <i>Eucalyptus spp.</i> | 724                        | 674              | 50       | 6.11%                      | 6.91%               | 28                 | 56.00%    |
| <i>Pinus spp.</i>      | 732                        | 690              | 42       | 5.13%                      | 5.74%               | 13                 | 30.95%    |
| <i>Quercus ilex</i>    | 2,798                      | 2,180            | 618      | 75.55%                     | 22.09%              | 82                 | 13.27%    |
| <i>Quercus suber</i>   | 529                        | 445              | 84       | 10.27%                     | 15.88%              | 14                 | 16.67%    |
| Other                  | 221                        | 197              | 24       | 2.93%                      | 10.86%              | 3                  | 12.50%    |
| Total                  | 5,004                      | 4,186            | 818      | 100%                       | 16.35%              | 140                | 17.11%    |

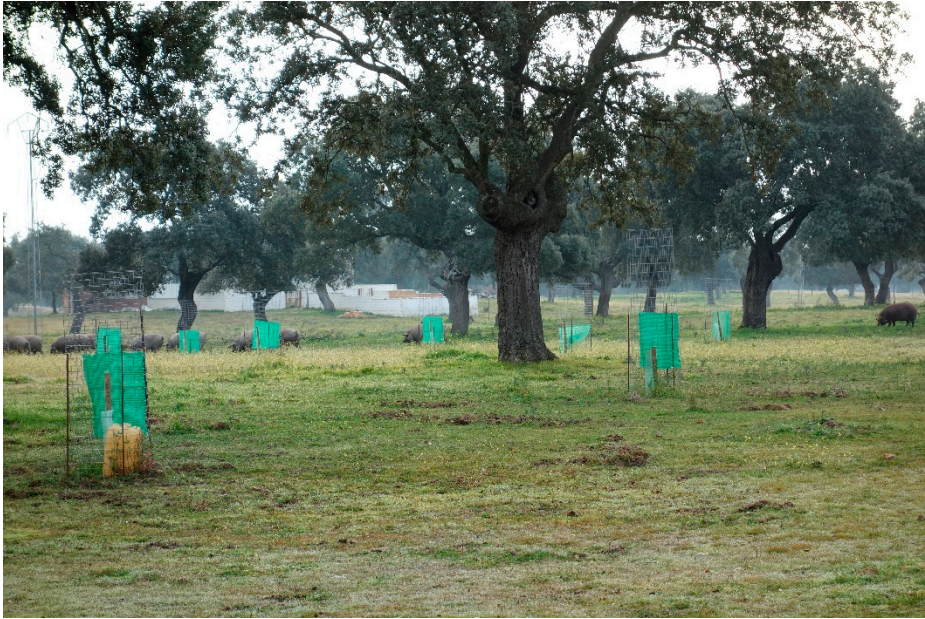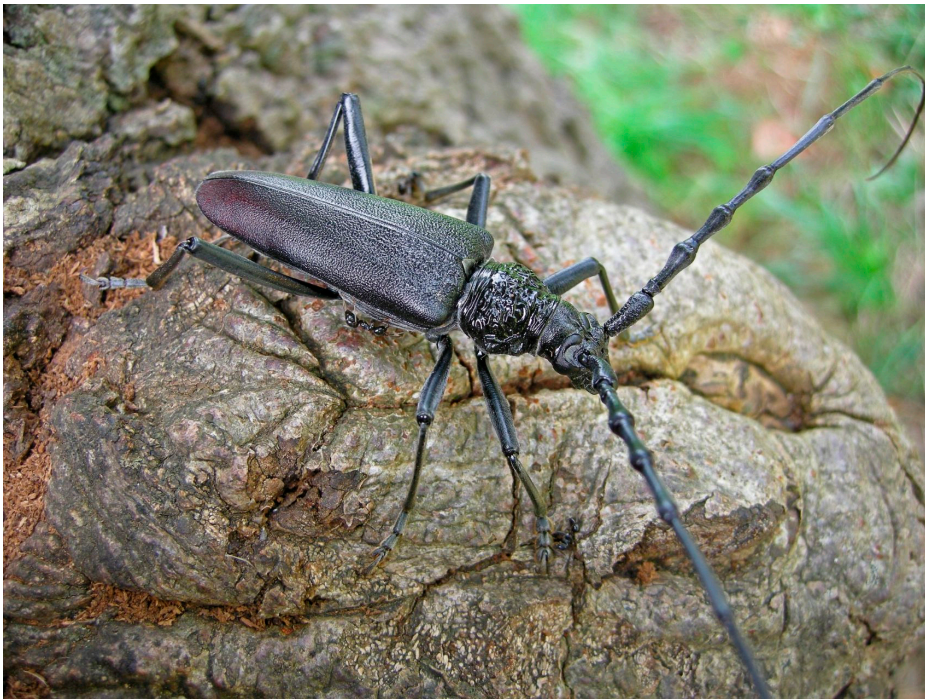

**Figure S1.** *Dehesa* ecosystems (up, obtained Rafael M Navarro-Cerrillo) and *Cerambyx cerdo* (down, obtained Sistema de Información de la Naturaleza de Euskadi, <https://www.ingurumena.ejgv.euskadi.eus/ac84aBuscadorWar/especies/10004>).

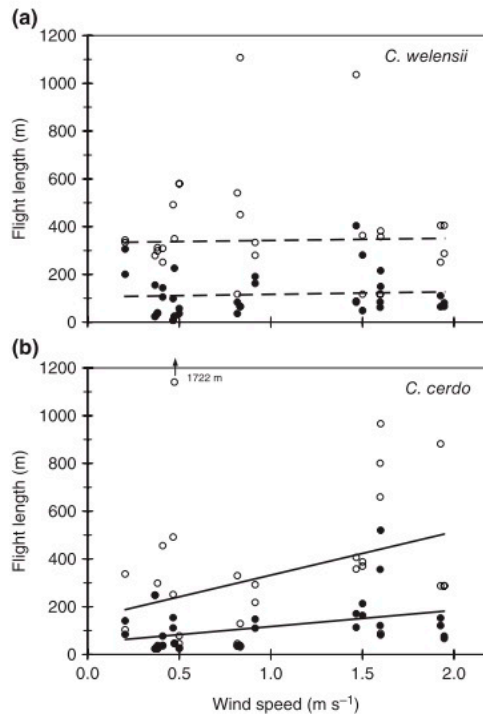

**Fig. 8.** The effect of wind speed on mean (full circles) and maximum (open circles) flight lengths in *Cerambyx welensii* (Cw, a) and *Cerambyx cerdo* (Cc, b). Regression equations and statistics were as follows: Cw (maximum flight),  $y = 9.32x + 332.77$ ,  $r^2 < 0.01$ ,  $F_{1,30} = 0.02$ ,  $P = 0.90$ ; Cw (mean flight),  $y = 10.81x + 105.61$ ,  $r^2 < 0.01$ ,  $F_{1,30} = 0.15$ ,  $P = 0.70$ ; Cc (maximum flight),  $y = 223.5x + 80.24$ ,  $r^2 = 0.28$ ,  $F_{1,29} = 11.53$ ,  $P < 0.01$ ; Cc (mean flight),  $y = 67.81x + 49.32$ ,  $r^2 = 0.15$ ,  $F_{1,29} = 4.96$ ,  $P < 0.05$ . A Cc female flying 1722 m (see b) was scored as an outlier and excluded from the regression analyses.

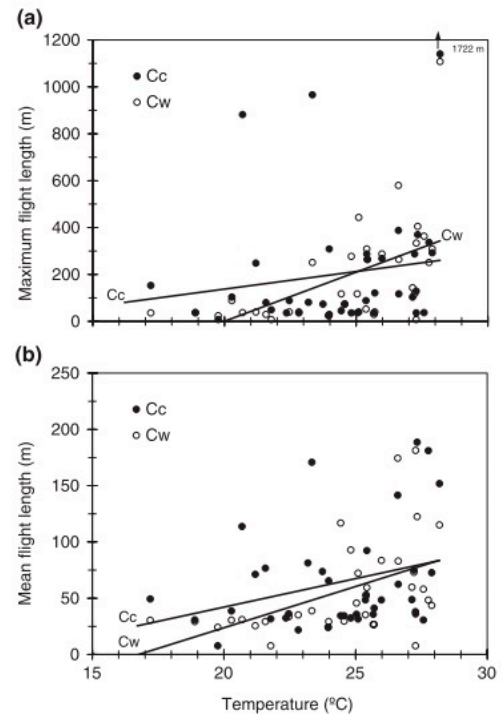

**Fig. 9.** The effect of mean daily temperature on maximum (a) and mean (b) flight lengths of *Cerambyx welensii* (Cw) and *Cerambyx cerdo* (Cc). Regression equations and statistics were as follows: Cw (maximum flight),  $y = 41.93x - 838.11$ ,  $r^2 = 0.34$ ,  $F_{1,33} = 16.69$ ,  $P < 0.001$ ; Cc (maximum flight),  $y = 22.89x - 339.62$ ,  $r^2 = 0.08$ ,  $F_{1,36} = 3.67$ ,  $P = 0.06 \sim 0.05$ ; Cw (mean flight),  $y = 7.33x - 122.95$ ,  $r^2 = 0.24$ ,  $F_{1,33} = 9.92$ ,  $P < 0.01$ ; Cc (mean flight),  $y = 5.06x - 59.17$ ,  $r^2 = 0.11$ ,  $F_{1,36} = 4.54$ ,  $P < 0.05$ .

**Figure S2.** Flight length and maximum flight length of *Cerambyx welensii* and *C. cerdo* against wind speed and temperatures (obtained from Torres-Vila et al. 2017a).



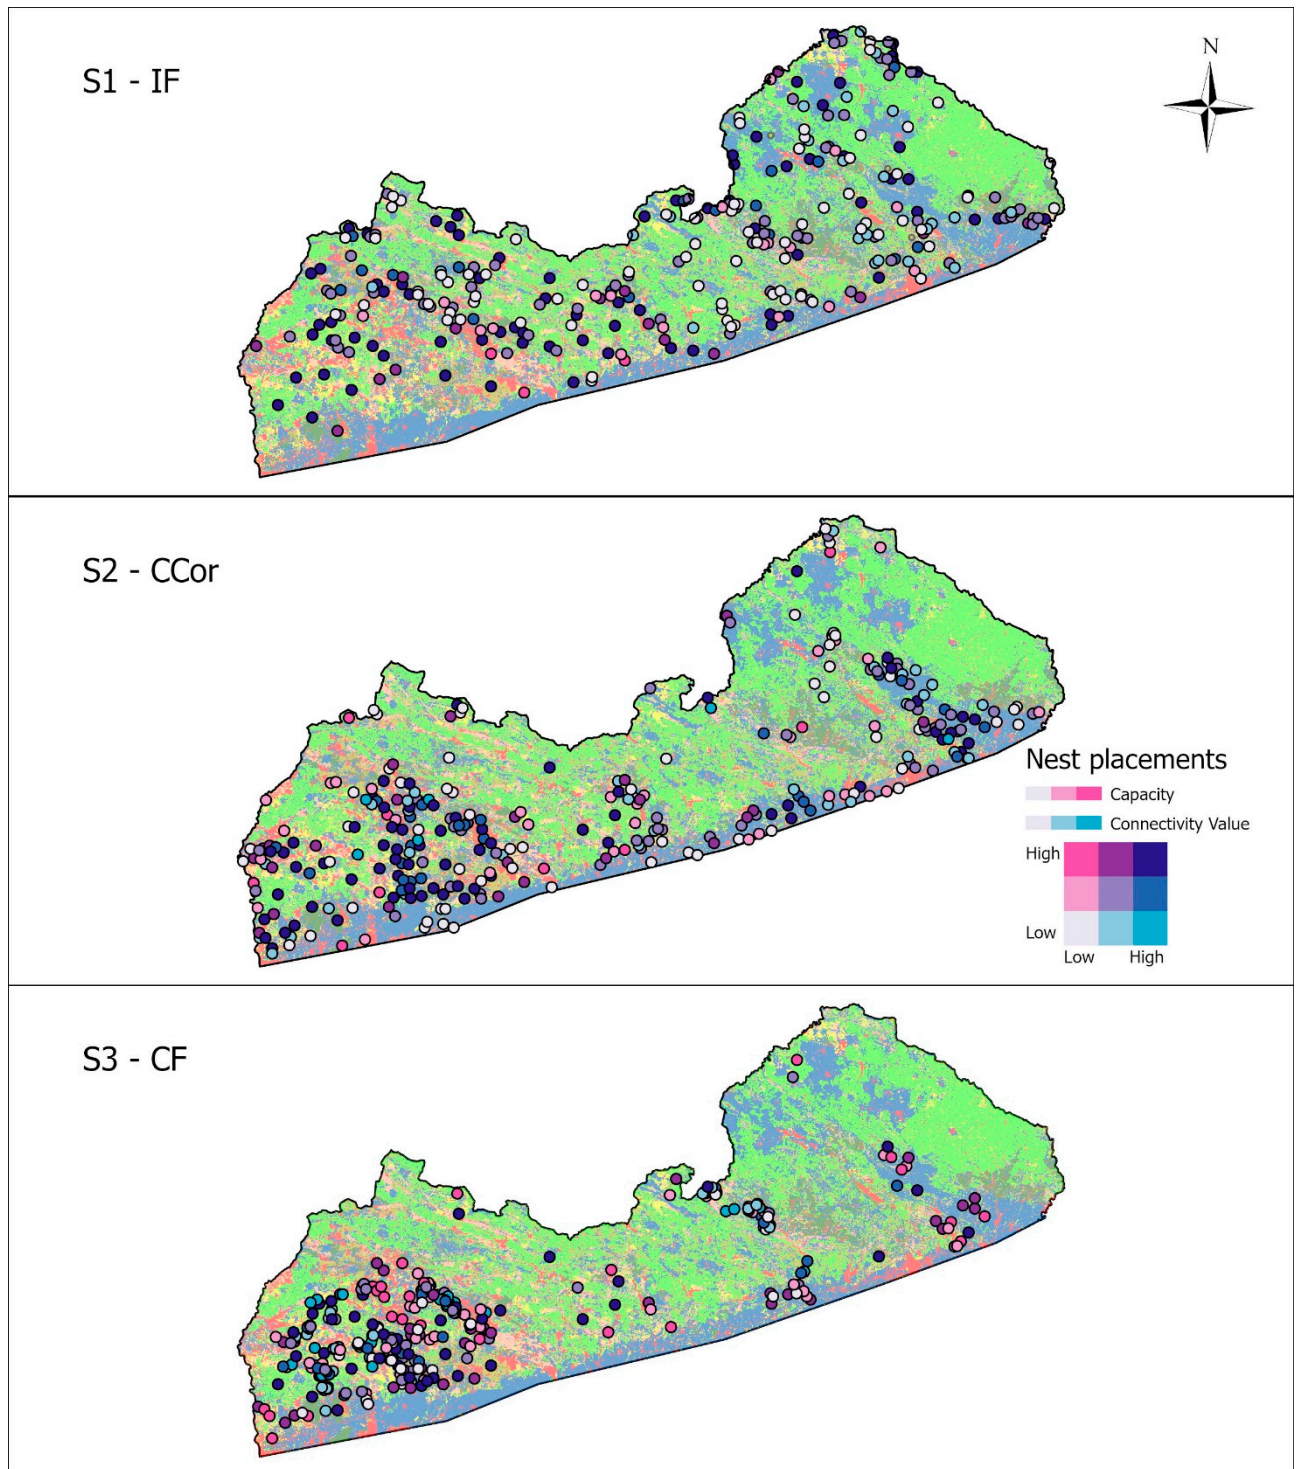

**Figure S3.** Spatial representation of nests in each scenario. Dots in each map represents the spatial location of the most connected patches for each scenario.
